# Supplementary material for: Web-Based Weight Loss Intervention for Men With Type 2 Diabetes: Pilot Randomized Controlled Trial
Source: PubMed Central journal article supplement (PMC6238853; doi:10.2196/diabetes.7430), 2017-07-07
Supplement: diabetes_v2i2e14_app2.pdf [file diabetes_v2i2e14_app2.pdf]

|                                 | Baseline       |                     | 3 months       |                     | 12 months      |                     |
|---------------------------------|----------------|---------------------|----------------|---------------------|----------------|---------------------|
|                                 | Control (n=28) | Intervention (n=33) | Control (n=16) | Intervention (n=24) | Control (n=12) | Intervention (n=20) |
| Outcome measure                 | Mean (SD)      | Mean (SD)           | Mean (SD)      | Mean (SD)           | Mean (SD)      | Mean (SD)           |
| <b>Height (cm)</b>              | 176.9 (6.9)    | 177.7 (7.3)         | 177.0 (6.7)    | 177.7 (7.7)         | 176.0 (5.7)    | 178.2 (8.4)         |
| <b>Weight (kg)</b>              | 108.5 (13.4)   | 107.2 (10.9)        | 104.4 (12.2)   | 103.6 (10.2)        | 103.8 (14.3)   | 100.7 (12.3)        |
| <b>Weight change (kg)</b>       | -              | -                   | -2.6 (2.7)     | -2.6 (2.7)          | -2.8 (4.4)     | -5.4 (5.9)          |
| <b>5% weight loss (No. (%))</b> | -              | -                   | 3 (18.8)       | 3 (12.5)            | 4 (33.3)       | 8 (40)              |
| <b>BMI</b>                      | 34.6 (3.0)     | 33.9 (2.6)          | 33.3 (2.8)     | 32.8 (2.4)          | 33.4 (3.3)     | 31.6 (2.6)          |
| <b>BMI change</b>               | -              | -                   | -0.9 (0.9)     | -0.8 (0.9)          | -0.9 (1.4)     | -1.3 (2.0)          |
| <b>Waist circumference (cm)</b> | 119.7 (8.9)    | 117.7 (7.6)         | 117.7 (7.9)    | 115.4 (7.6)         | 118.2 (9.3)    | 113.1 (7.1)         |
| <b>Waist change (cm)</b>        | -              | -                   | -3.2 (2.7)     | -2.5 (3.1)          | -2.6 (3.5)     | -4.5 (4.9)          |
